# Supplementary material for: Testing for local adaptation in brown trout using reciprocal transplants
Source: PubMed Central journal article supplement (PMC3567948; doi:10.1186/1471-2148-12-247), 2012-12-18
Supplement: 1471-2148-12-247-S1.pdf [file 1471-2148-12-247-S1.pdf]

## Supplementary Material

Table S1: Summary of the hatchery program for brown trout in the five study streams. Alevins were raised for some weeks (either in the hatchery or in small streamlets) before released into the stream of origin.

| Stream              | n years <sup>1</sup> | n females<br>per year <sup>2</sup> | n alevins<br>per year <sup>2,3</sup> | Total n of alevins<br>produced for stocking <sup>3</sup> |
|---------------------|----------------------|------------------------------------|--------------------------------------|----------------------------------------------------------|
| Kiese <sup>4</sup>  | 22                   | 103.3 (6-266)                      | 32.8 (2.8-66.5)                      | 721                                                      |
| Dorfbach            | 11                   | 136.8 (89-230)                     | 52.2 (25.5-88.6)                     | 574                                                      |
| Biberenbach         | 24                   | 90.6 (45-181)                      | 34.7 (18.3-100.3)                    | 832                                                      |
| Giesse <sup>4</sup> | 18                   | 54.7 (15-99)                       | 38.7 (5.6-76.1)                      | 697                                                      |
| Worble <sup>4</sup> | 14                   | 75.7 (17-189)                      | 33.4 (6.6-73.5)                      | 234                                                      |

<sup>1</sup> number of years that spawners were collected from the respective stream between winter 1981/82 and 2010/11

<sup>2</sup> mean and range

<sup>3</sup> in thousands

<sup>4</sup> data extracted from Stelkens *et al.* (2012)
